# Supplementary material for: MIC‐MAC: An automated pipeline for high‐throughput characterization and classification of three‐dimensional microglia morphologies in mouse and human postmortem brain samples
Source: PubMed Central journal article supplement — Glia. 2019 Apr 14;67(8):1496–509. doi: 10.1002/glia.23623 (PMC6617786; doi:10.1002/glia.23623), 2019-04-14
Supplement: GLIA-67-1496-s006.pdf [file GLIA-67-1496-s006.pdf]

|    |                                                                        |                                                                     |
|----|------------------------------------------------------------------------|---------------------------------------------------------------------|
| 1  | Link Density                                                           | Number of edges divided by the number of node pairs                 |
| 2  | Average Node Degree                                                    | Average degree for all the nodes in the graph                       |
| 3  | Mean Edge Length                                                       | Mean length of all edges in the graph                               |
| 4  | Max. Edge Length                                                       | Longest edge in the graph                                           |
| 5  | Mean Closeness of $A$                                                  | Average inverse sum of distances from each node to all other nodes  |
| 6  | Mean Closeness of $W$                                                  | Average inverse sum of distances from each node to all other nodes  |
| 7  | Max. Closeness of $A$                                                  | Maximal inverse sum of distances from each node to all other nodes  |
| 8  | Max. Closeness of $W$                                                  | Maximal inverse sum of distances from each node to all other nodes  |
| 9  | Min. Closeness of $A$                                                  | Minimal inverse sum of distances from each node to all other nodes  |
| 10 | Min. Closeness of $W$                                                  | Minimal inverse sum of distances from each node to all other nodes  |
| 11 | Mean Node Betweenness of $W$                                           | Average number of shortest paths going through each node            |
| 12 | Max. Node Betweenness of $W$                                           | Maximal number of shortest paths going through a node               |
| 13 | Mean EigenCentrality of $A$                                            | Average of eigenvector components for largest eigenvalue            |
| 14 | Mean EigenCentrality of $W$                                            | Average of eigenvector components for largest eigenvalue            |
| 15 | Max. EigenCentrality of $A$                                            | Largest eigenvector component for largest eigenvalue                |
| 16 | Max. EigenCentrality of $W$                                            | Largest eigenvector component for largest eigenvalue                |
| 17 | Min. EigenCentrality of $A$                                            | Smallest eigenvector component for largest eigenvalue               |
| 18 | Min. EigenCentrality of $W$                                            | Smallest eigenvector component for largest eigenvalue               |
| 19 | S-Metric                                                               | Summed products of nodal degrees across all edges                   |
| 20 | Diameter of $A$                                                        | Maximum shortest path across all node pairs for $A$                 |
| 21 | Diameter of $W$                                                        | Maximum shortest path across all node pairs for $W$                 |
| 22 | Radius of $A$                                                          | The minimum vertex eccentricity                                     |
| 23 | Radius of $W$                                                          | The minimum vertex eccentricity                                     |
| 24 | Mean Path Length of $A$                                                | The average shortest path                                           |
| 25 | Mean Path Length of $W$                                                | The average shortest path                                           |
| 26 | Mean Vertex Eccentricity of $A$                                        | Average maximal distance of each node to any other node             |
| 27 | Mean Vertex Eccentricity of $W$                                        | Average maximal distance of each node to any other node             |
| 28 | Max. Vertex Eccentricity of $A$                                        | Maximal distance of a node to any other node                        |
| 29 | Max. Vertex Eccentricity of $W$                                        | Maximal distance of a node to any other node                        |
| 30 | Min. Vertex Eccentricity of $A$                                        | Minimal distance of a node to any other node                        |
| 31 | Min. Vertex Eccentricity of $W$                                        | Minimal distance of a node to any other node                        |
| 32 | Ending Nodes Density                                                   | Number of ending nodes over total number of nodes                   |
| 33 | Volume                                                                 | Number of voxels that constitute the volume                         |
| 34 | Spreadness                                                             | Ratio between volume of convex hull and structure volume            |
| 35 | Maximal Bounding Box Length                                            | Largest dimension of bounding box enclosing a structure             |
| 36 | 2nd Largest Bounding Box Length                                        | 2nd largest dimension of bounding box enclosing a structure         |
| 37 | 3rd Largest Bounding Box Length                                        | 3rd largest dimension of bounding box enclosing a structure         |
| 38 | Ratio of 1 <sup>st</sup> and 2 <sup>nd</sup> Lengths                   | Measure for elongation                                              |
| 39 | Ratio of 1 <sup>st</sup> /(2 <sup>nd</sup> + 3 <sup>rd</sup> ) Lengths | Measure for eccentricity                                            |
| 40 | Ratio of 2 <sup>nd</sup> /3 <sup>rd</sup>                              | Measure for roundness                                               |
| 41 | Inverse Edge Density                                                   | Volume in voxels divided by the number of existing edges            |
| 42 | Mean Tortuosity                                                        | Average curvature of projections (length of edge/distance of nodes) |
| 43 | Max. Tortuosity                                                        | Maximal curvature of projections (length of edge/distance of nodes) |
| 44 | Min. Tortuosity                                                        | Minimal curvature of projections (length of edge/distance of nodes) |
| 45 | Polarity                                                               | Average direction of the projections emerging from the central node |
| 46 | Normalized Polarity                                                    | Polarity normalized by max. distance between end and central nodes  |
| 47 | Mean of Centroid Radii                                                 | Average distance of centroid to structure border                    |
| 48 | Variance of Centroid Radii                                             | Variance of centroid distances to structure border                  |
| 49 | Variance norm. Centroid Radii                                          | Variance of normalized centroid distances to structure border       |
| 50 | Sphericity                                                             | Ratio between mean and variance of Mean Centroid Radius             |
| 51 | Mean of Radii of all Nodes                                             | Average distance from each node to border for all nodes             |
| 52 | Max. Mean Radii of all Nodes                                           | Largest distance from a node to the border                          |
| 53 | Min. Mean Radii of all Nodes                                           | Smallest distance from a node to the border                         |
| 54 | Mean Var. of Radii of all Nodes                                        | Average variance of Centrality                                      |
| 55 | Max. Variance of Radii of all Nodes                                    | Largest variance of Centrality                                      |
| 56 | Min. Variance of Radii of all Nodes                                    | Smallest variance of Centrality                                     |

|    |                                    |                                                        |
|----|------------------------------------|--------------------------------------------------------|
| 57 | Mean norm. Var. of all Nodes Radii | Average of normalized variance of Centrality           |
| 58 | Max. norm. Var. of all Nodes Radii | Largest normalized variance of Centrality              |
| 59 | Min. norm. Var. of all Nodes Radii | Smallest normalized variance of Centrality             |
| 60 | Node density                       | Number of nodes divided by total volume                |
| 61 | Edge density                       | Number of edges divided by total volume                |
| 62 | Edge length density                | Sum of the length of all edges divided by total volume |

**Supplementary Table 1:** List of morphology features used for cell classification. White numbering corresponds to graph-based, orange to purely geometrical and blue to combined features. Most graph-based features are calculated based on the corresponding adjacency matrix  $A$  and weight matrix  $W$  (Methods).
